# Supplementary material for: Novel protein-rich materials from rapeseed meal with enhanced mechanical behavior
Source: Preprints.org preprint supplement (doi:10.20944/preprints202406.1872.v1), 2024-06-27
Supplement: Supplementary file 1 [file supplementary]

## SUPPLEMENTARY MATERIALS

### ***Novel protein-rich materials from rapeseed meal with enhanced mechanical behavior***

Sara Aquilia,<sup>1,2,3</sup> Luca Rosi,<sup>2</sup> Michele Pinna,<sup>3</sup> Sabrina Bianchi,<sup>3</sup> Walter Giurlani,<sup>2</sup> Marco Bonechi,<sup>2</sup> Francesco Ciardelli,<sup>3\*</sup> Anna Maria Papini,<sup>1,2\*</sup> Claudia Bello<sup>1,2</sup>

1. Interdepartmental Research Unit of Peptide and Protein Chemistry and Biology, University of Florence, Via della Lastruccia 13, I-50019 Sesto Fiorentino, Italy
2. Department of Chemistry "Ugo Schiff", University of Florence, Via della Lastruccia 13, I-50019 Sesto Fiorentino, Italy
3. Spin-PET S.r.l., Viale R. Piaggio 32, I-56025 Pontedera, Italy

\* Correspondence: [annamaria.papini@unifi.it](mailto:annamaria.papini@unifi.it); [ciardelli@spinpet](mailto:ciardelli@spinpet)

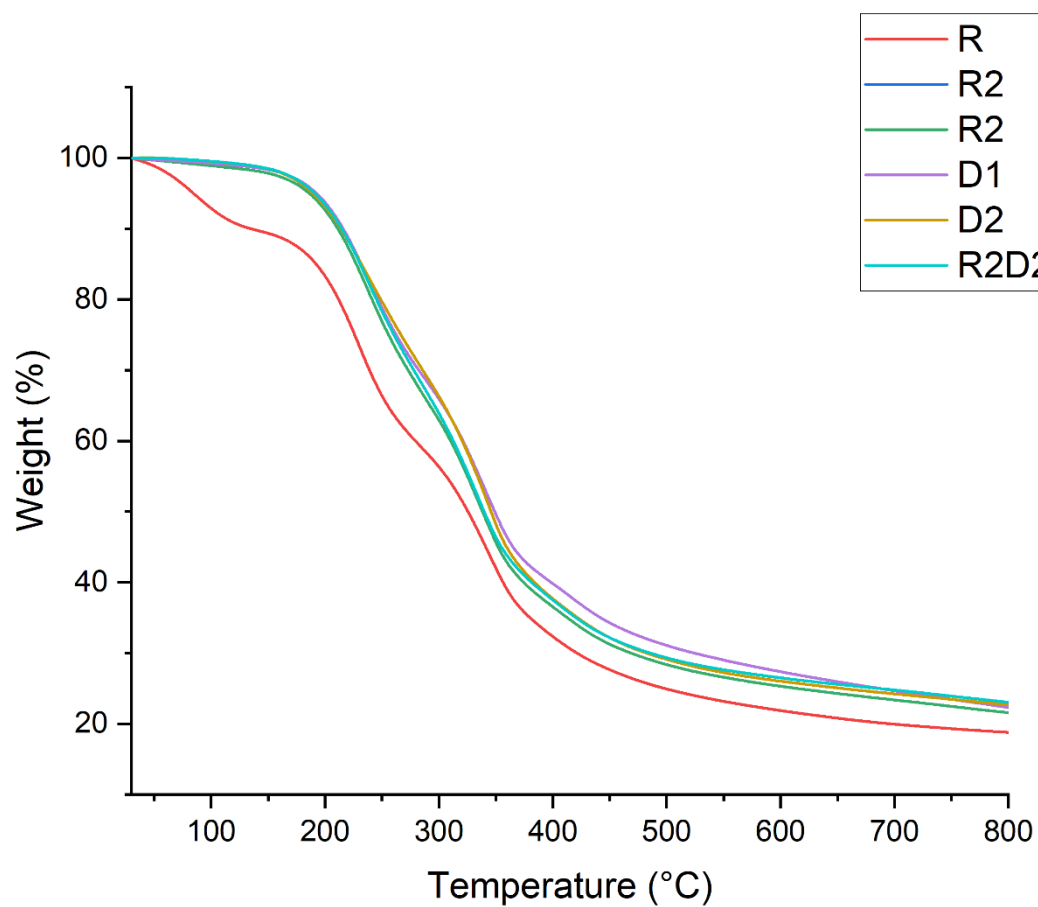

**Figure S1.** TG curves of specimens RM, RM-R2, RM-D1, RM-D2 and RM-R2D2 14%

RM-R0

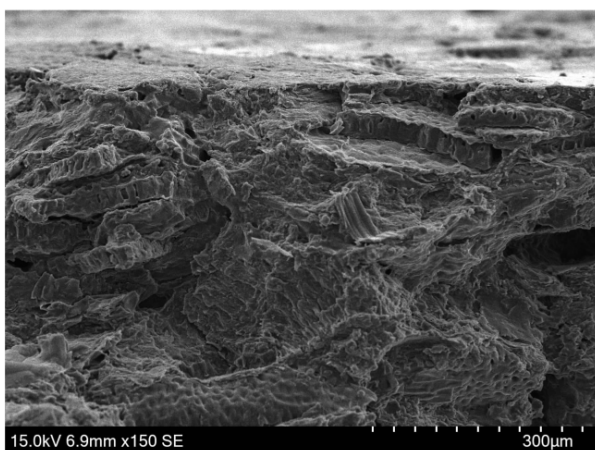

RM

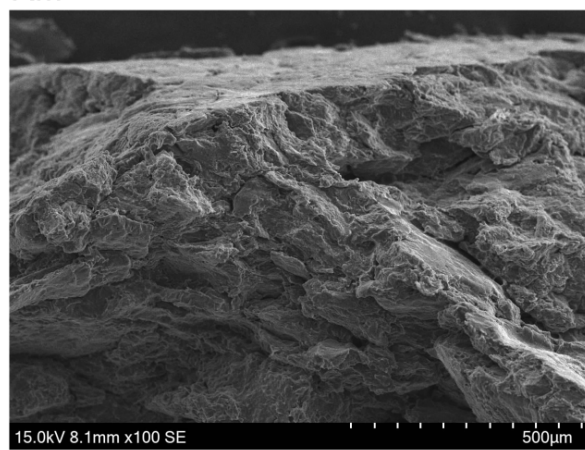

RM-R2

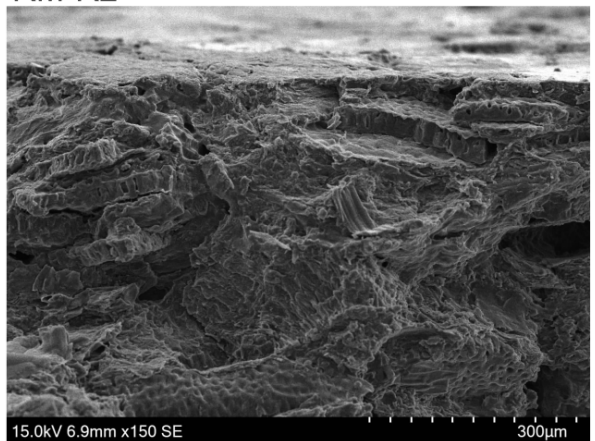

RM-D1

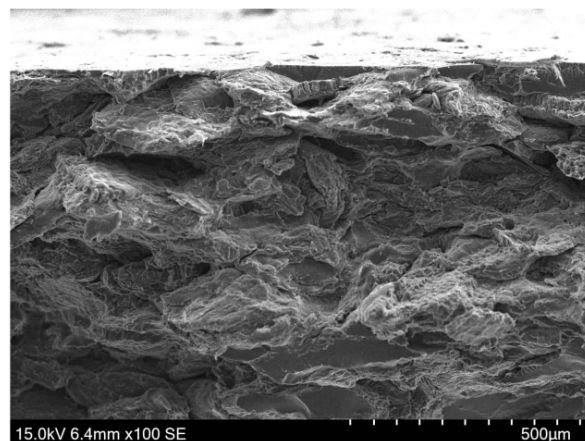

RM-D2

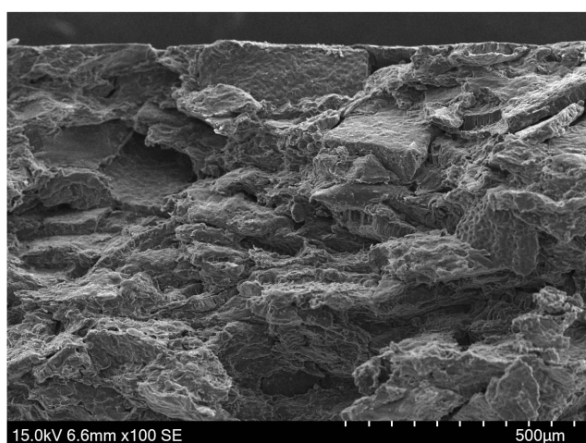

RM-R2D2-14%

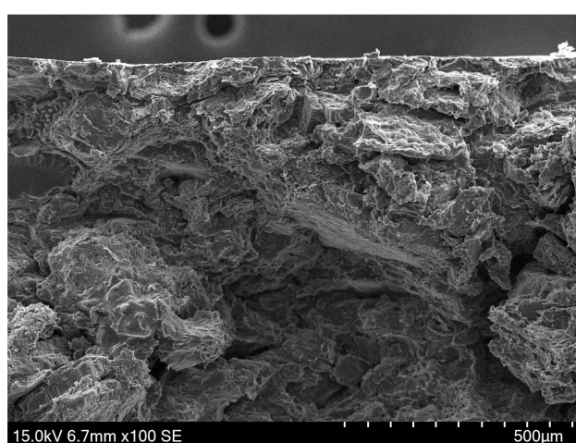

**Figure S2.** SEM of the rapeseed meal-based materials (cross section, room temperature)  
RM-R0, RM, RM-R2, RM-D1, RM-D2, RM-R2D2 14% at 300μm or 500μm

RM-R0

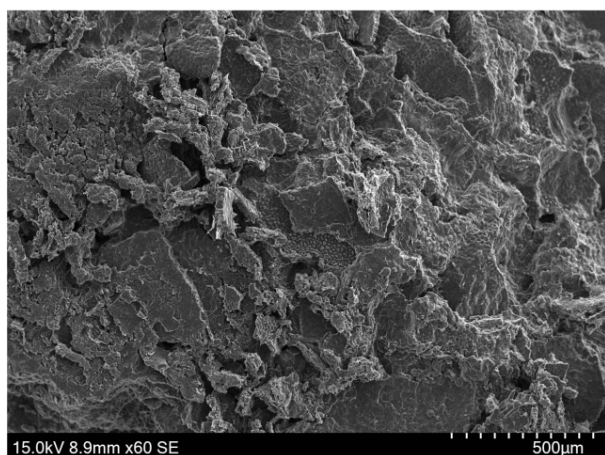

RM

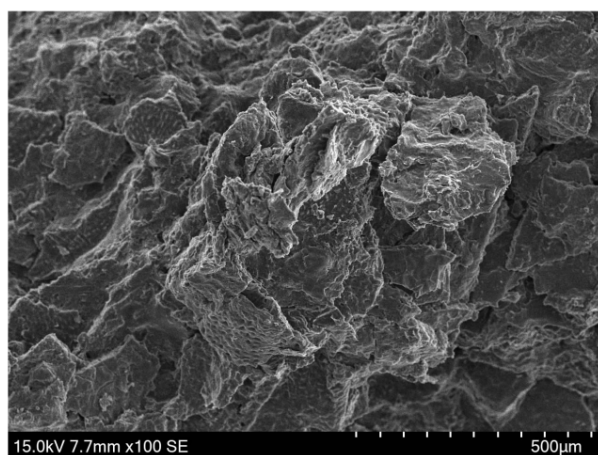

RM-R2

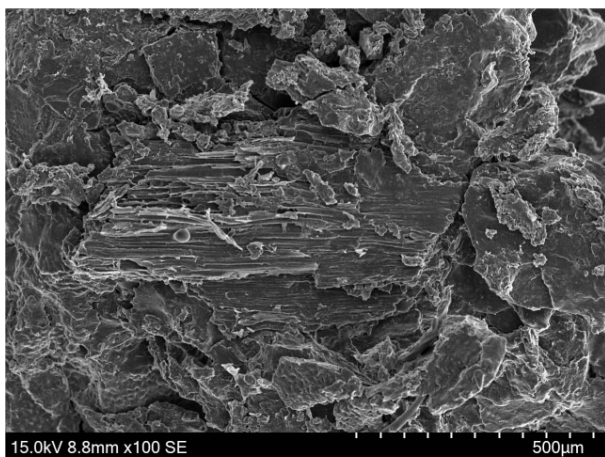

RM-D1

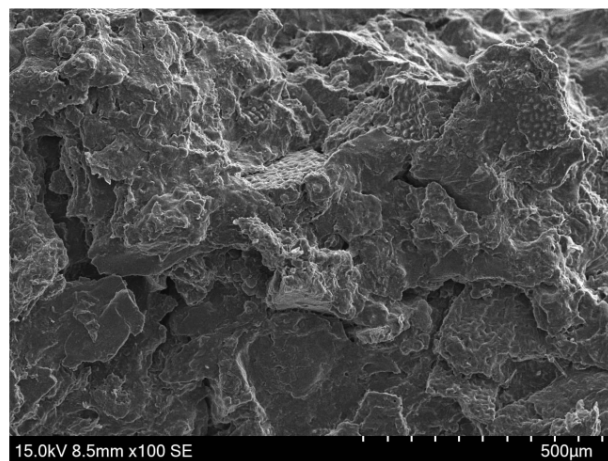

RM-D2

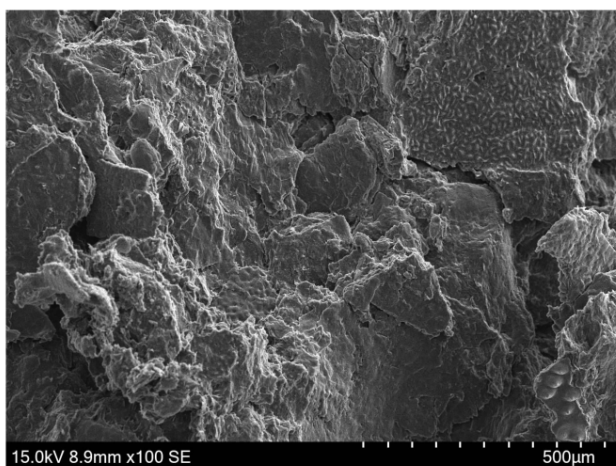

RM-R2D2-14%

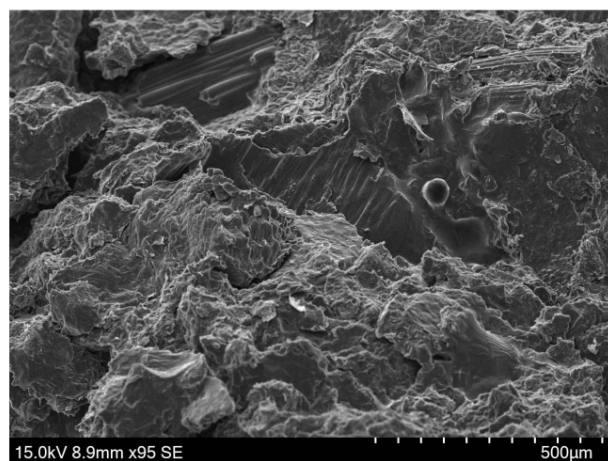

**Figure S3.** SEM of the rapeseed meal-based materials (longitudinal section, room temperature) RM-R0, RM, RM-R2, RM-D1, RM-D2, RM-R2D2 14% at 500µm



RM-R0

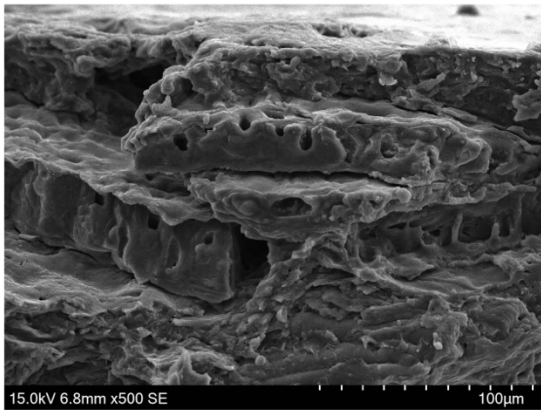

RM

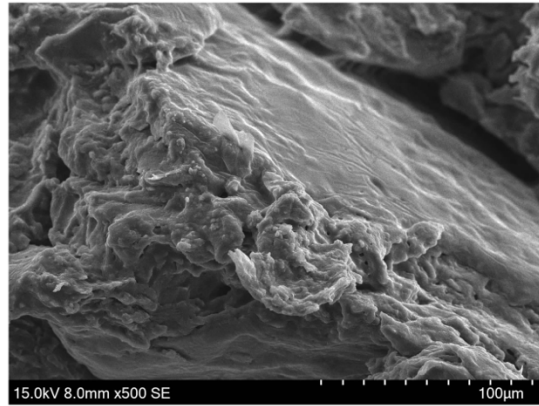

RM-R2

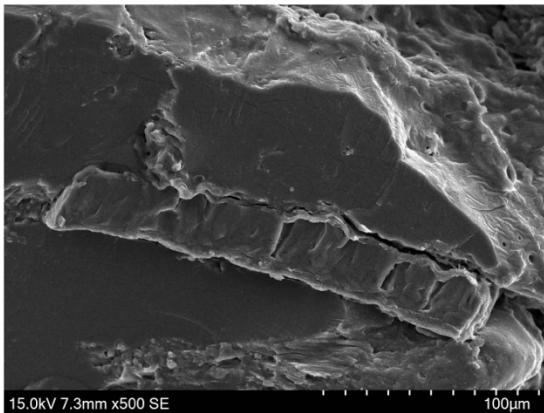

RM-D1

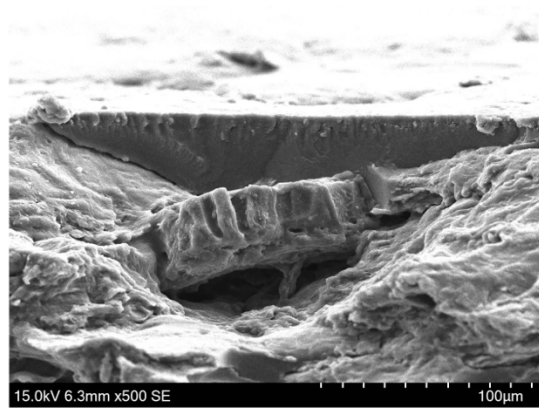

RM-D2

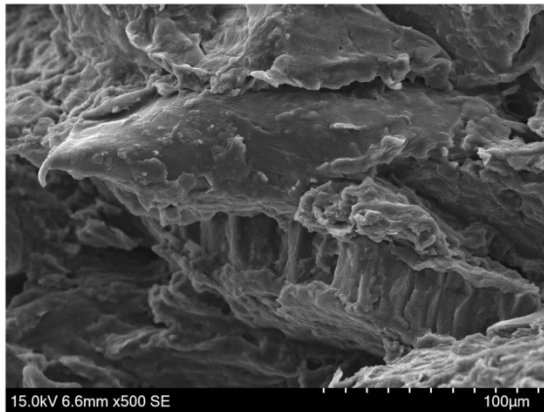

RM-R2D2 14%

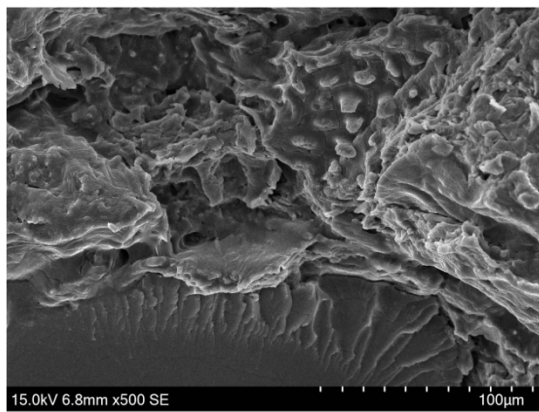

**Figure S4.** SEM of the rapeseed meal-based materials (cross section, room temperature)  
RM-R0, RM, RM-R2, RM-D1, RM-D2, RM-R2D2 14% at 100 μm

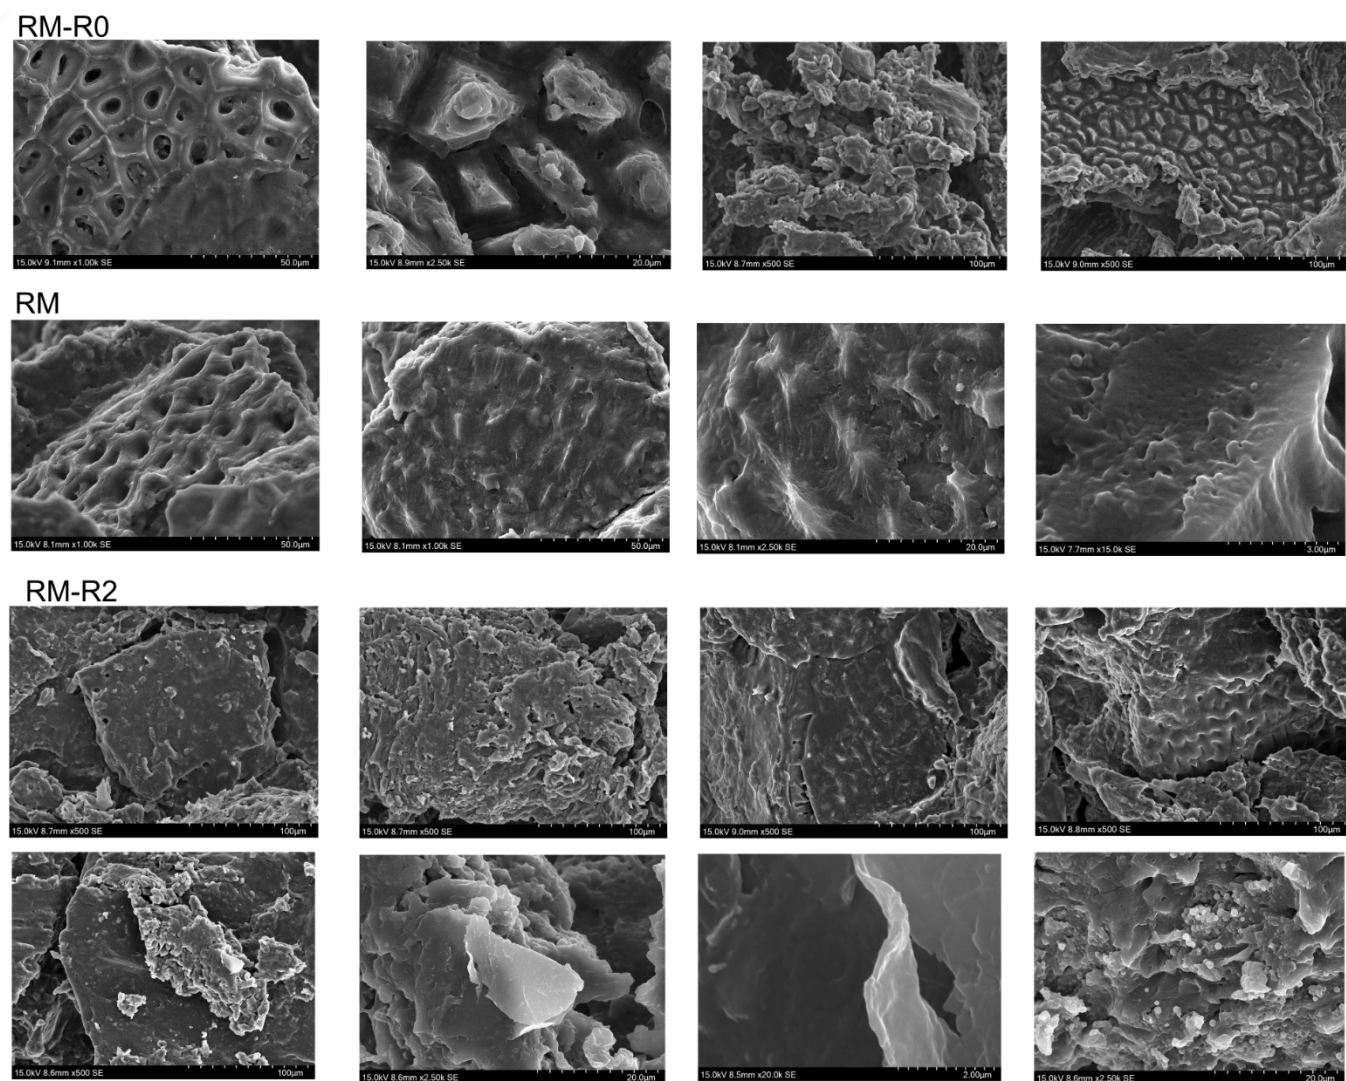

**Figure S5.** SEM of the rapeseed meal-based materials (longitudinal section, room temperature) RM-R0, RM and RM-R2 at 100µm to 2µm

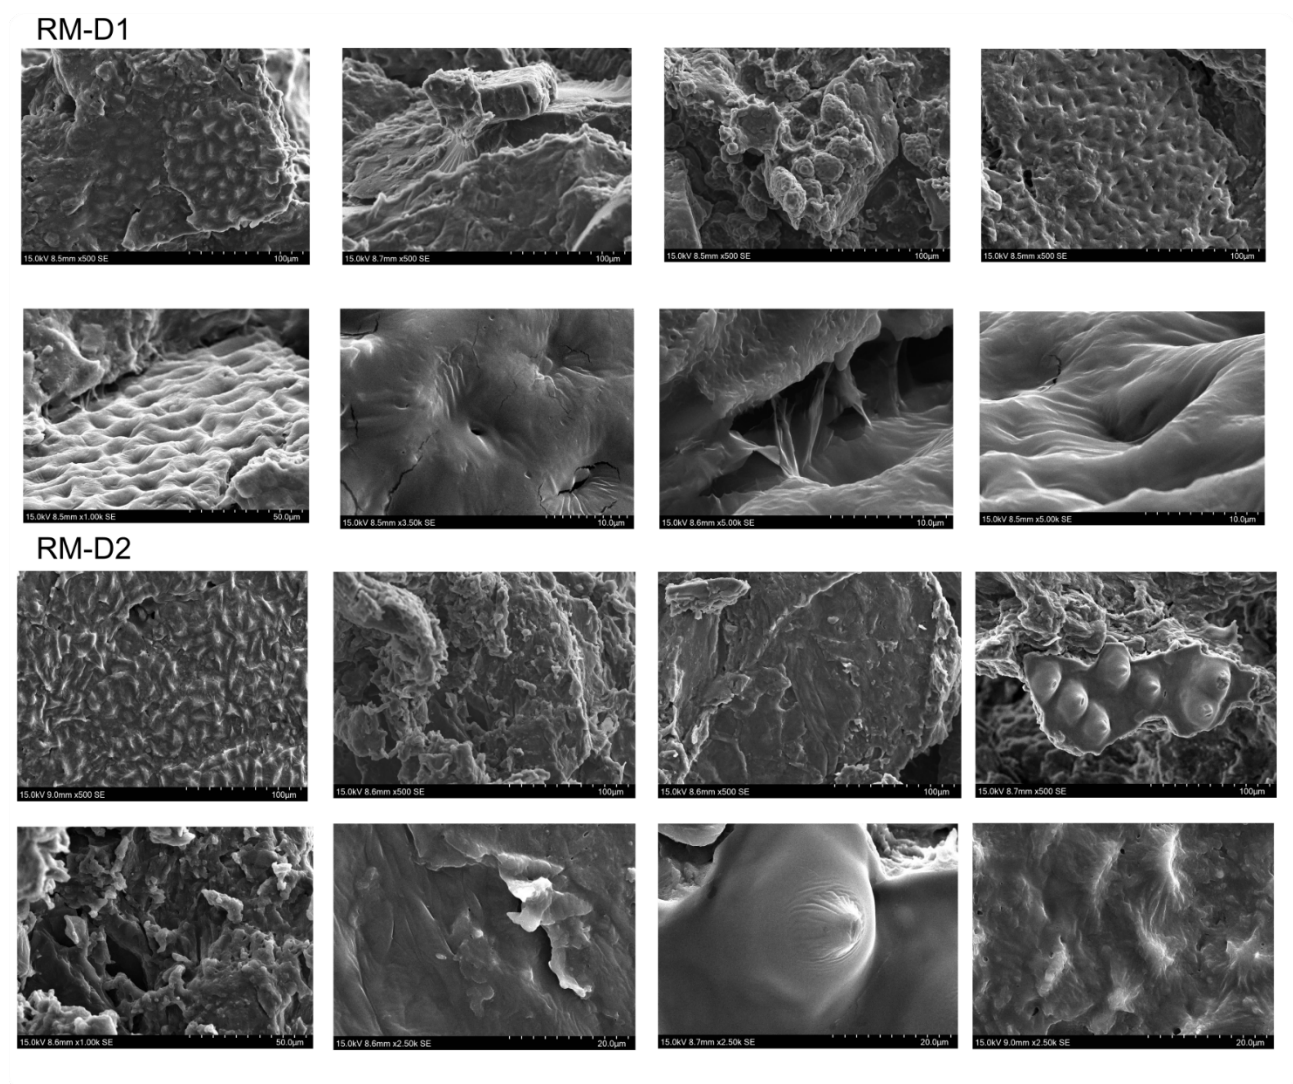

**Figure S6.** SEM of the rapeseed meal-based materials (longitudinal section, room temperature) D1 and D2 at 100µm to 10µm

RM-R2D2 14%

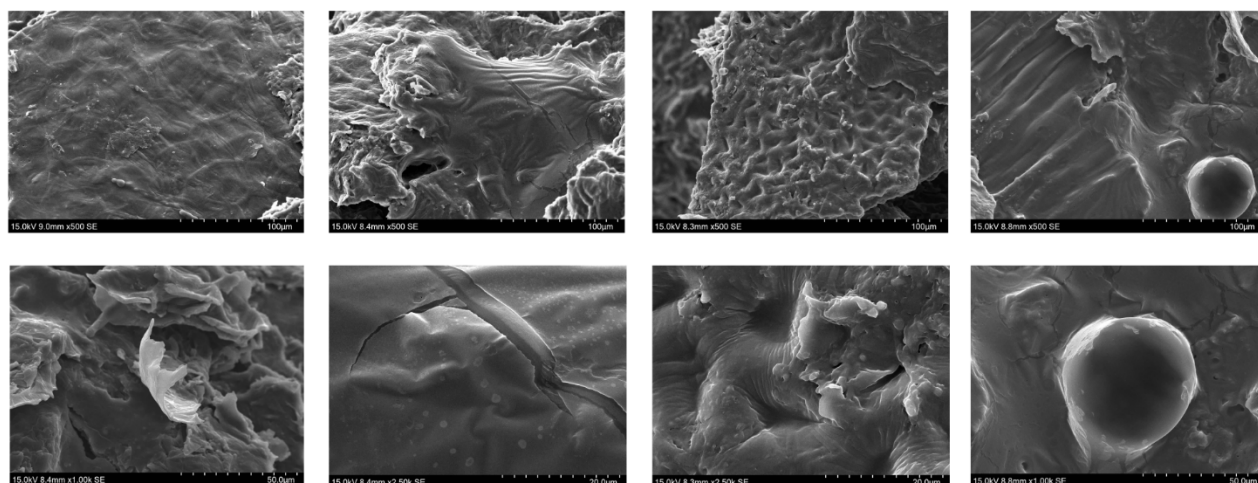

**Figure S7.** SEM of the rapeseed meal-based materials (longitudinal section, room temperature) RM-R2D2 14% at 100um to 20um
